# Supplementary material
Source: PubMed Central journal article supplement (PMC6925623)

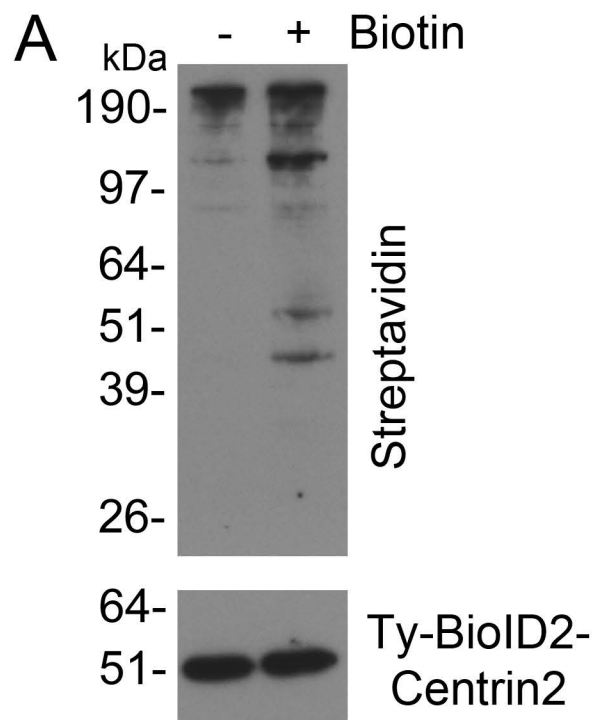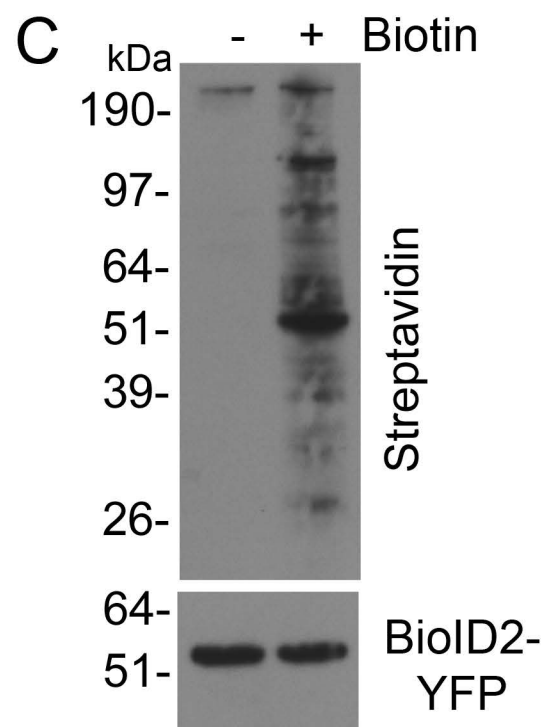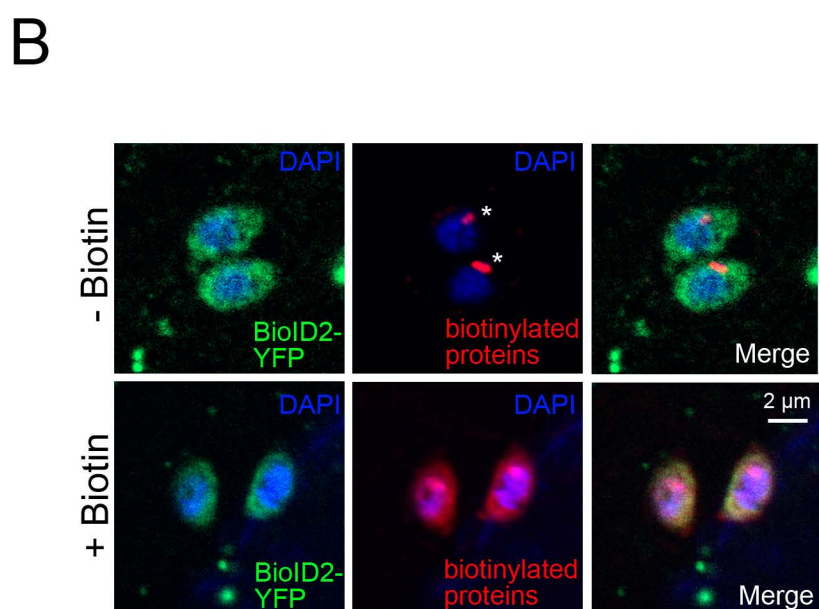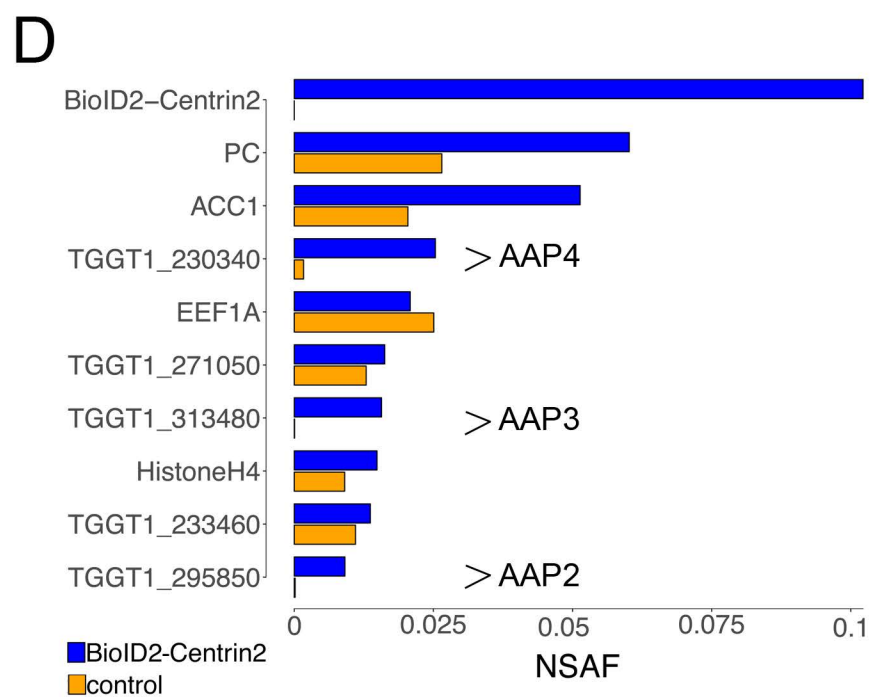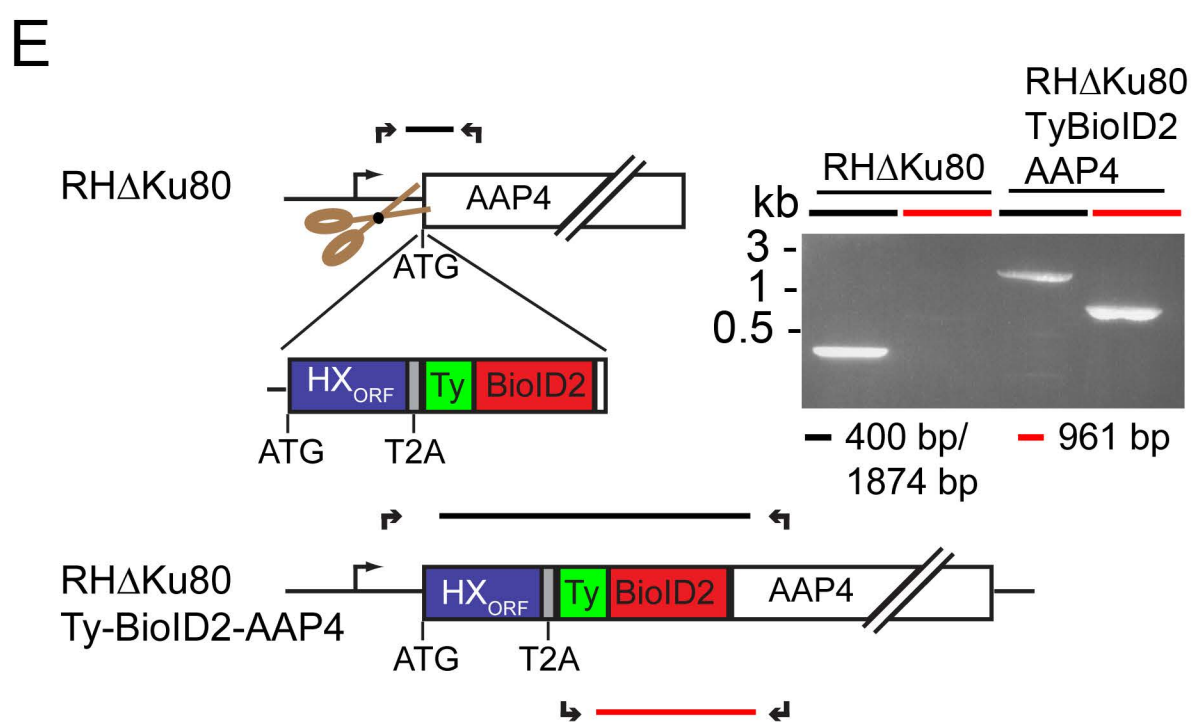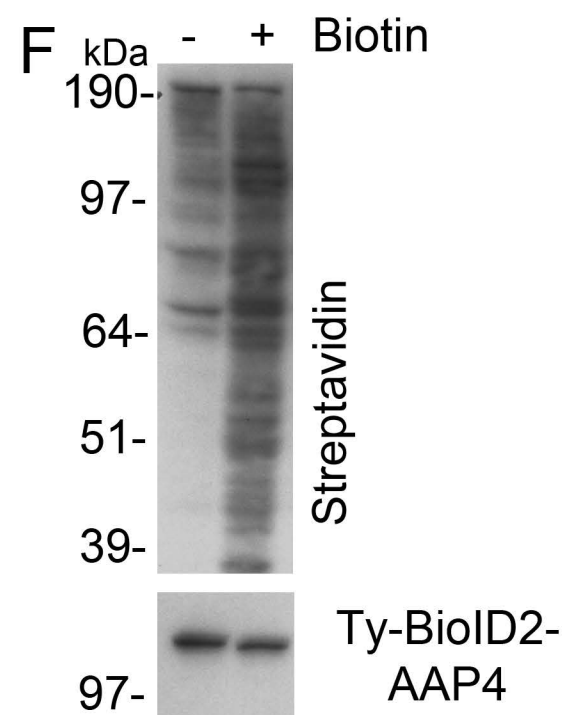

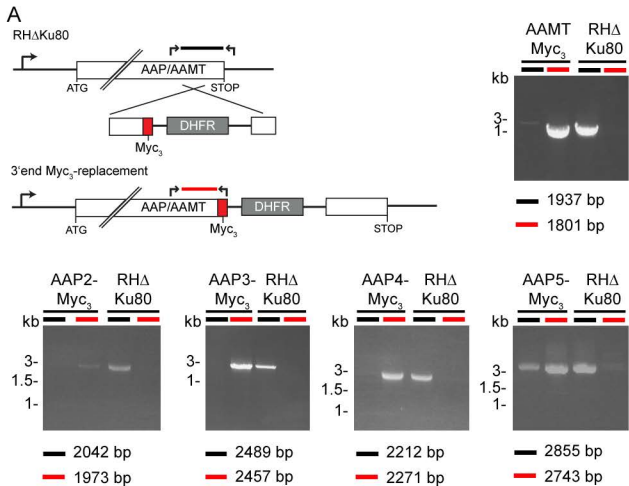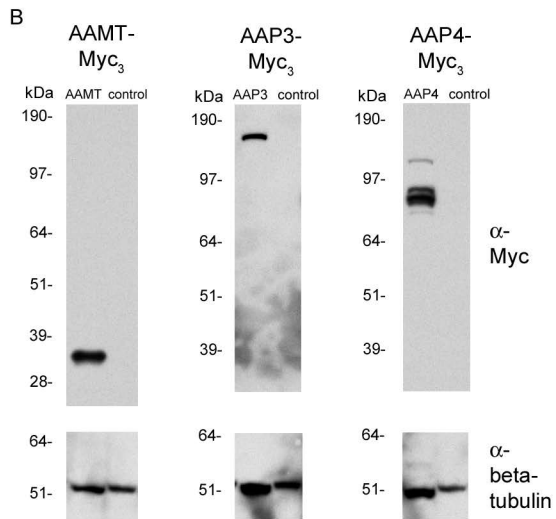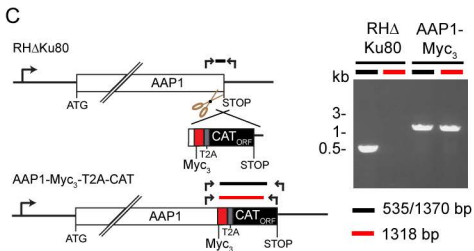

**A** 8 *H. hammondi* AAP1 repeats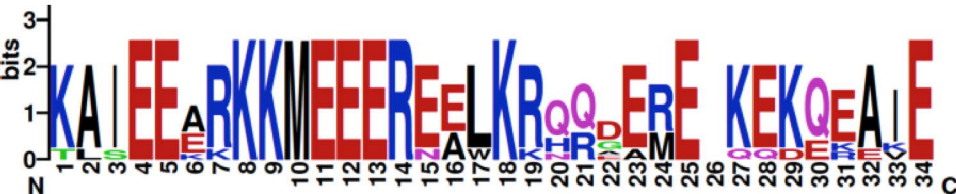**B** 10 *N. caninum* AAP1 repeats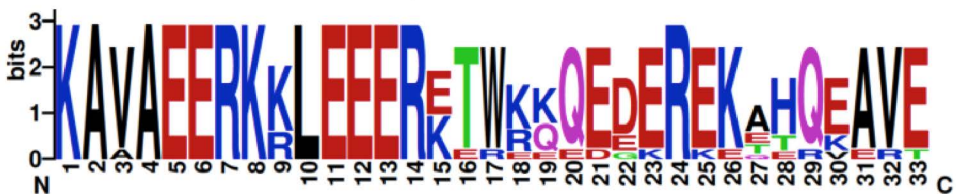**C** 11 *T. gondii*, 10 *N. caninum* and 8 *H. hammondi* AAP1 repeats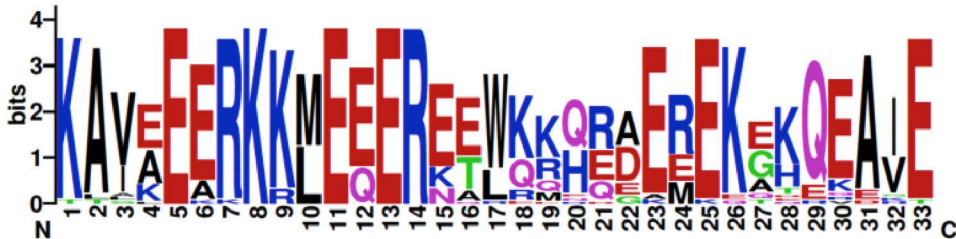

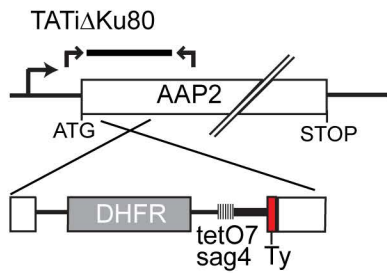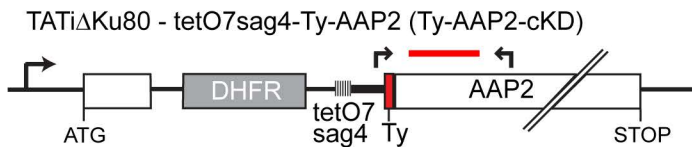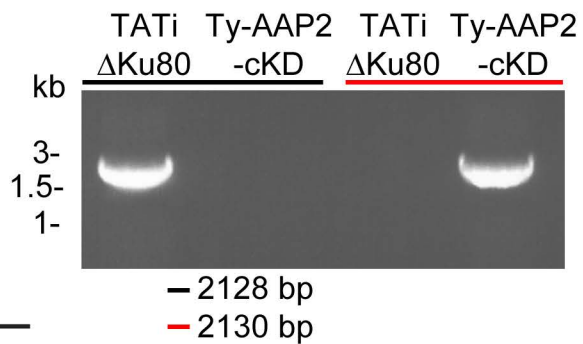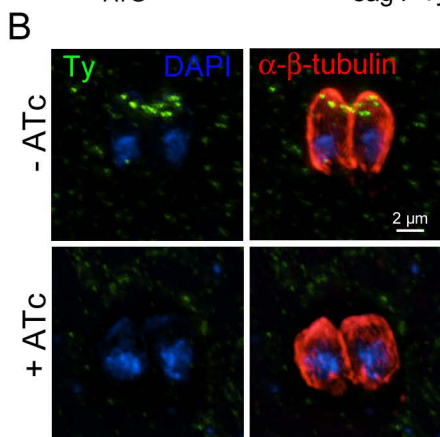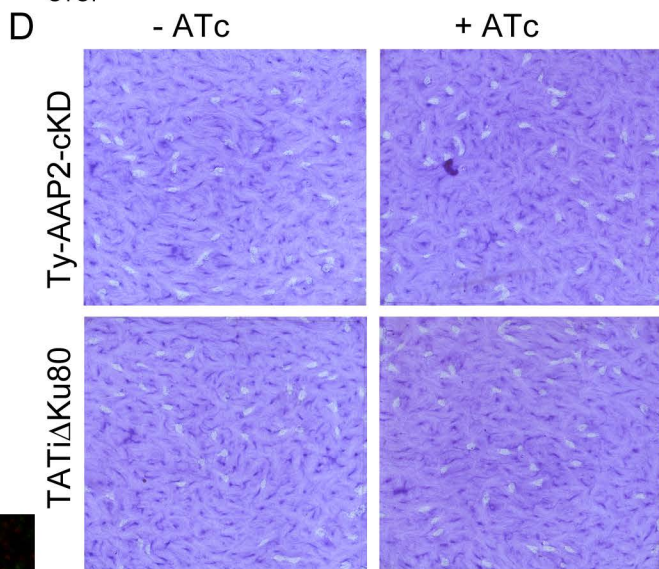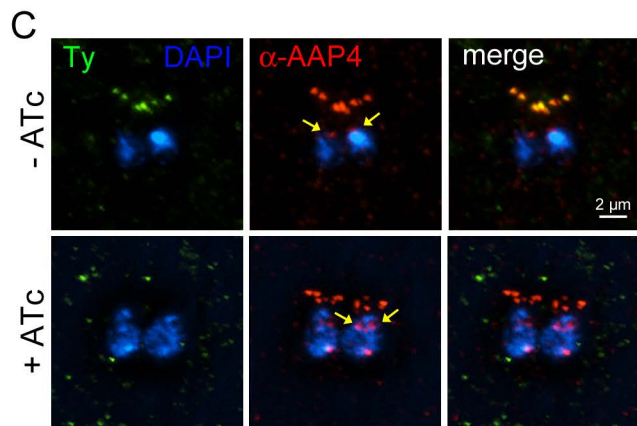

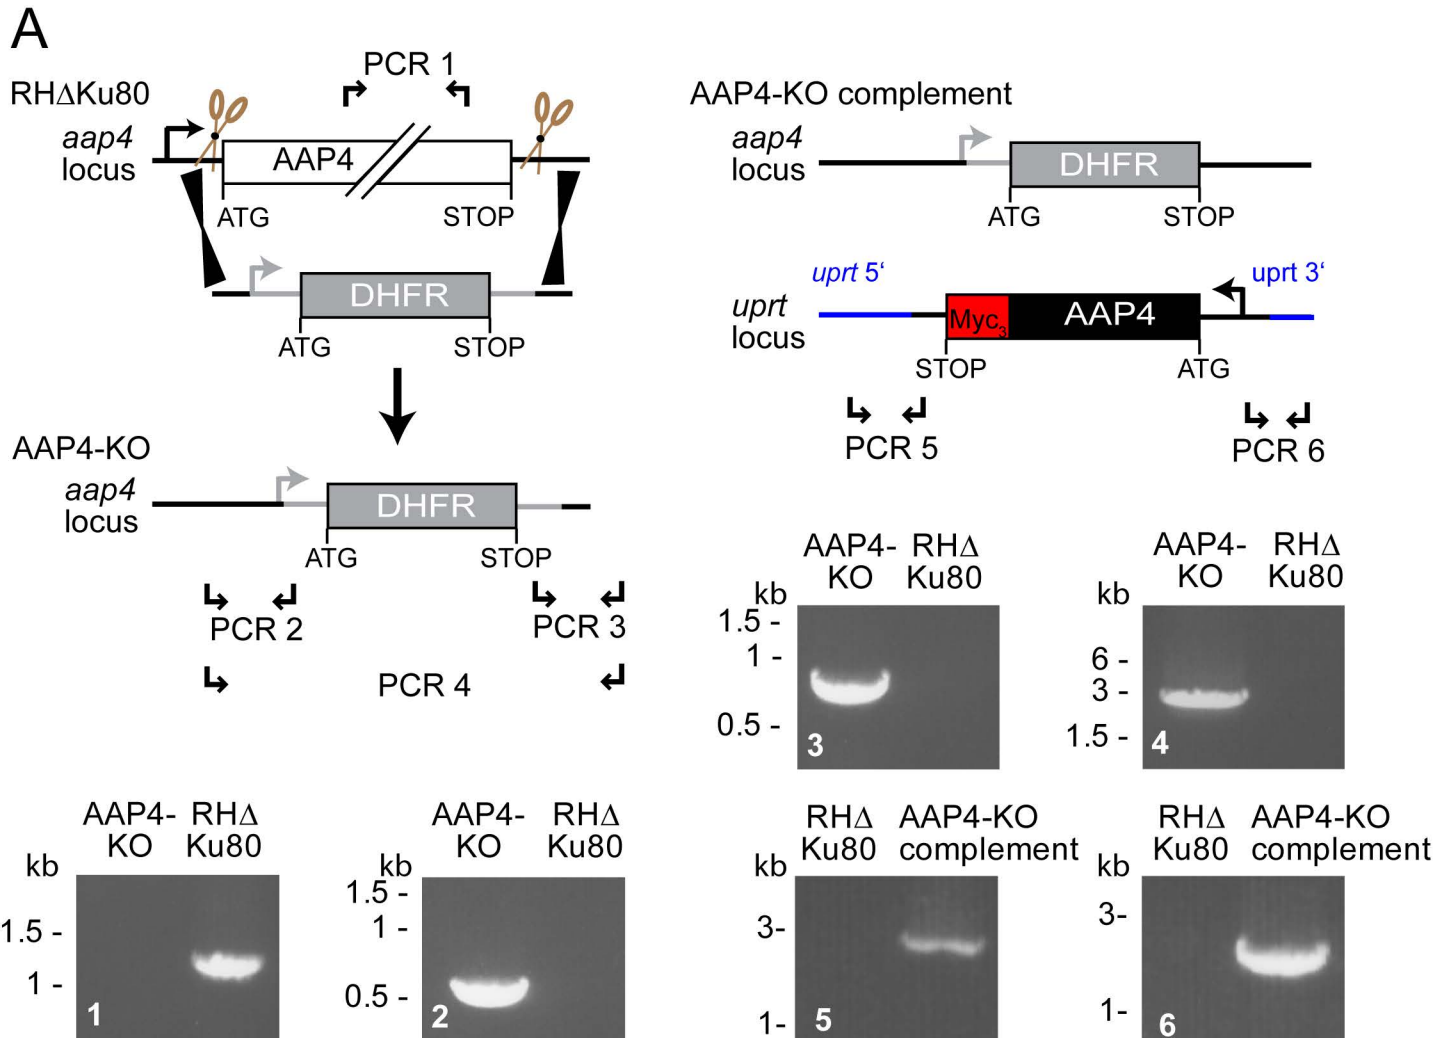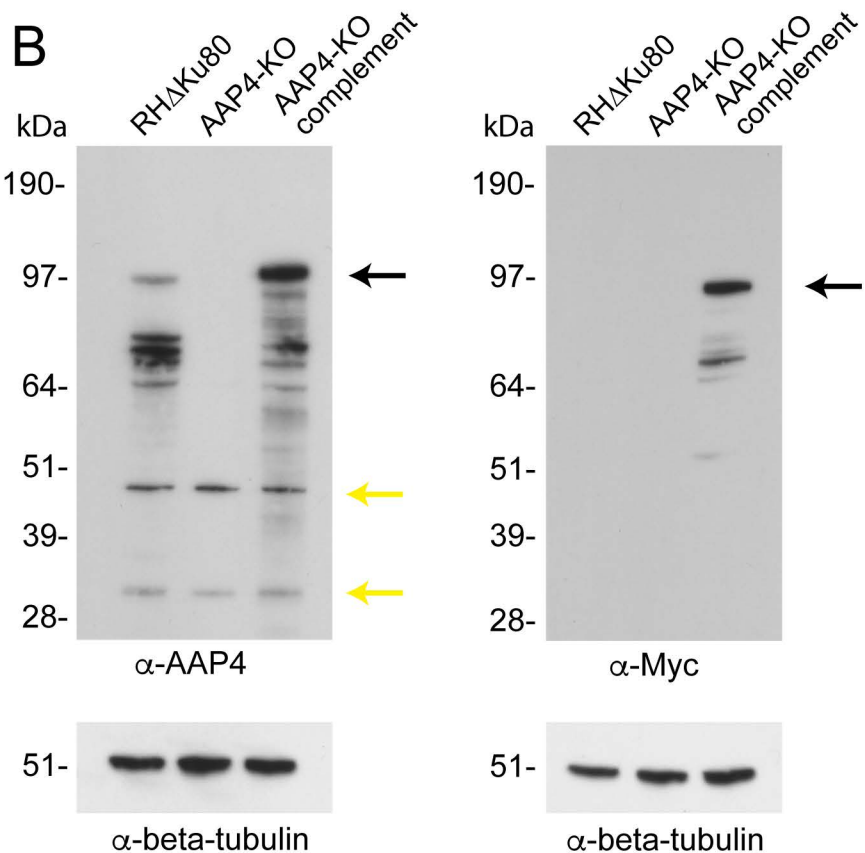

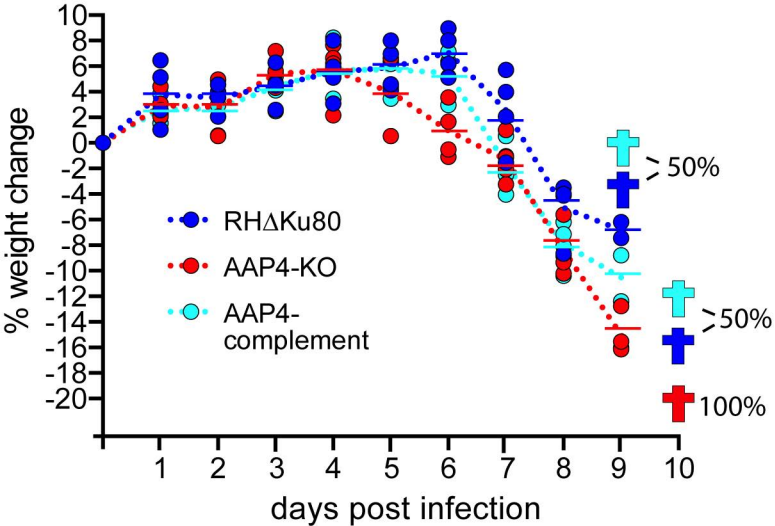

Supplement: NIHMS1538492-supplement-Supp_figS1-6.pdf [file NIHMS1538492-supplement-Supp_figS1-6.pdf]
